# Supplementary material for: High Baseline Insulin Levels Associated With 6-Year Incident Observed Sleep Apnea
Source: Oxford University Press journal article supplement (doi:10.2337/dc09-1901), 2010-02-25
Supplement: dc091901-sup-onlineappendix.pdf [file dc091901-sup-onlineappendix.pdf]

## On-Line APPENDIX

### Sleep Questionnaire used in the study: Data from an Epidemiological Study on the Insulin resistance syndrome (D.E.S.I.R.)

- How many hours do you sleep  
when you are working?    
when you are not working?
- Has someone said to you that you stop breathing during your sleep? ☐ yes ☐ no  
If yes, how often does this happen  
☐ rarely ☐ often ☐ almost every night
- Do you usually have an agitated sleep? ☐ yes ☐ no
- Do you have difficulty waking up in the morning? ☐ yes ☐ no  
If yes, how often does this happen  
☐ rarely ☐ often ☐ almost every night
- Are you troubled by an unexplained chronic tiredness? ☐ yes ☐ no
- Do you sometimes wake with a headache? ☐ yes ☐ no
- Do you wake frequently during the night? ☐ yes ☐ no
- Do you snore during the night? ☐ do not know ☐ yes ☐ no  
If yes, how often ?  
☐ almost always (6 to 7 nights a week) ☐ often p(4 to 5 nights per week)  
☐ sometimes (2 to 3 nights per week) ☐ rarely (one night per week or less)  
☐ I do not know  
At what age did someone say you snored, or you realized yourself that you snored?    
Do you have a separate bedroom because of your snoring? ☐ yes ☐ no
- Are you troubled by sleepiness during the day? (you would like to sleep or you fight to remain awake) ☐ yes ☐ no  
If yes, how often does this happen  
☐ rarely ☐ often ☐ almost every night  
For how many years have you had this problem of sleeping?
- Imagine that you are in one of the following situations, and choose the most appropriate number for each situation  

|                                                               |                                                             |
|---------------------------------------------------------------|-------------------------------------------------------------|
| <input type="checkbox"/> <i>[0] would never doze</i>          | <input type="checkbox"/> <i>[1] slight chance of dozing</i> |
| <input type="checkbox"/> <i>[2] moderate chance of dozing</i> | <input type="checkbox"/> <i>[3] high chance of dozing</i>   |

  - ☐ Sitting and reading
  - ☐ Watching TV
  - ☐ Sitting inactive in a public place (e.g. a theatre, a meeting)
  - ☐ As a passenger in a car for an hour without a break
  - ☐ Lying down to rest in the afternoon when circumstances permit
  - ☐ Sitting and talking to someone
  - ☐ Sitting quietly after lunch without alcohol
  - ☐ In a car, while stopped for a few minutes in the traffic.
